# Supplementary material for: Effects of Microcystin-LR on the Microstructure and Inflammation-Related Factors of Jejunum in Mice
Source: MDPI journal article supplement (doi:10.3390/toxins11090482), 2019-08-21
Supplement: s1 [file s1]

# Supplementary Materials: Effects of Microcystin-Leucine Arginine on the Microstructure and Inflammation-Related Factors of Jejunum in Mice

Linghui Cao, Feiyu Huang, Isaac Yaw Massey, Cong Wen, Shuilin Zheng, Shuaishuai Xu and Fei Yang \*

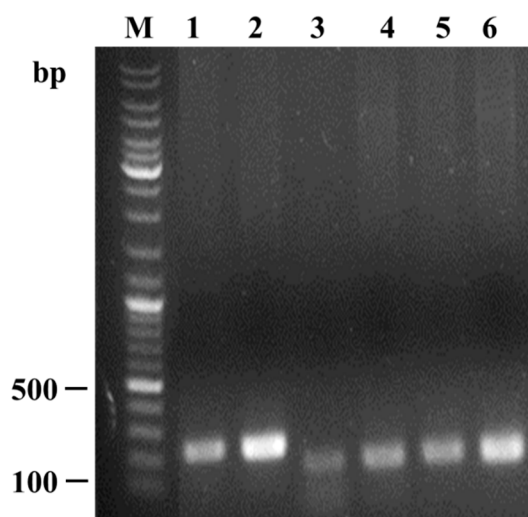

**Figure 1.** Suitability detection of primers. M: DNA marker, No.1, 2, 3, 4, 5 and 6 track represents PCR amplification products with TNF- $\alpha$  Forward / TNF- $\alpha$  Reverse, IL-10 Forward / IL-10 Reverse, IL-1 $\beta$  Forward / IL-1 $\beta$  Reverse,  $\beta$ -actin Forward /  $\beta$ -actin Reverse, IL-8 Forward / IL-8 Reverse, TGF- $\beta$ 1 Forward / TGF- $\beta$ 1 Reverse primer pairs respectively. There was no miscellaneous band below the target band of each primer.

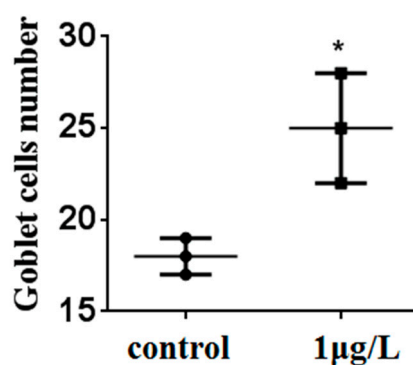

**Figure S2.** Quantification of goblet cells in Figure 1B. \* indicates  $p \leq 0.05$ .
